# Supplementary material
Source: PubMed Central journal article supplement (PMC4424051)
Supplement: NIHMS683042-supplement-Table_S1.pdf [file NIHMS683042-supplement-Table_S1.pdf]

| Strain       | Ecotype    | Origin                                        | Source     | Induced to grow on Gly + GlcN by <i>S. hominis</i> ? |
|--------------|------------|-----------------------------------------------|------------|------------------------------------------------------|
| NCYC 3453    | baking     | Baker's strain, Netherlands                   | NCYC       | Yes                                                  |
| English Ale  | beer       | Brewing                                       | White Labs | Yes                                                  |
| Budvar Lager | beer       | Czech republic brewery                        | Wyeast     | Yes                                                  |
| Y-7327       | beer       | Tibetan beer starter                          | ARSC       | Yes                                                  |
| NCYC 3471    | clinical   | Clinical isolate (vaginal), Bergamo, Italy.   | NCYC       | Yes                                                  |
| NCYC 3449    | fruit      | Cladode of <i>Opuntia megacantha</i> , Hawaii | NCYC       | Yes                                                  |
| YB-399       | fruit      | Cherries                                      | ARSC       | Yes                                                  |
| Sigma 1278b  | laboratory | Laboratory                                    | Gerry Fink | Yes                                                  |
| NCYC 3452    | sake       | Shochu Sake strain, Japan                     | NCYC       | Yes                                                  |
| NCYC 3312    | soil       | Soil, Netherlands.                            | NCYC       | Yes                                                  |
| NCYC 3266    | wine       | Wine/lab                                      | NCYC       | Yes                                                  |
| Y-162        | wine       | Port wine                                     | ARSC       | Yes                                                  |
| Y-266        | wine       | Burgundy wine                                 | ARSC       | Yes                                                  |
| NCYC 3445    | wine       | Palm Wine, Africa.                            | NCYC       | Yes                                                  |
| Y-2411       | wine       | Vineyard, Turkey                              | ARSC       | Yes                                                  |

Supplementary Table 1
