# Supplementary material
Source: PubMed Central journal article supplement (PMC4424051)
Supplement: NIHMS683042-supplement-Table_S2.pdf [file NIHMS683042-supplement-Table_S2.pdf]

| Condition                            | Exposure Duration | [GAR <sup>+</sup> ] frequency           | Fold Increase |
|--------------------------------------|-------------------|-----------------------------------------|---------------|
| Control, no treatment                | 4h                | 7.0 ( <u>+4.9</u> ) x 10 <sup>-6</sup>  | -             |
| pH 4                                 | 4h                | 3.9 ( <u>+1.5</u> ) x 10 <sup>-6</sup>  | 0.6           |
| pH 5                                 | 4h                | 10.6 ( <u>+7.3</u> ) x 10 <sup>-6</sup> | 1.5           |
| pH 6                                 | 4h                | 6.3 ( <u>+2.2</u> ) x 10 <sup>-6</sup>  | 0.9           |
| pH 8                                 | 4h                | 11.2 ( <u>+9.8</u> ) x 10 <sup>-6</sup> | 1.6           |
| pH 9                                 | 4h                | 4.8 ( <u>+1.7</u> ) x 10 <sup>-6</sup>  | 0.7           |
| Farnesol (75 μM)                     | 4h                | 5.7 ( <u>+4.1</u> ) x 10 <sup>-6</sup>  | 0.8           |
| 2-phenylethanol (50 μM)              | 4h                | 4.0 ( <u>+3.2</u> ) x 10 <sup>-6</sup>  | 0.6           |
| <i>S. hominis</i> conditioned medium | 4h                | 6.9 ( <u>+4.2</u> ) x 10 <sup>-4</sup>  | 98.6          |
| Boiled for 20 min                    | 4h                | 6.3 ( <u>+5.4</u> ) x 10 <sup>-4</sup>  | 90.0          |
| Held at pH 4 for 1 hour              | 4h                | 7.0 ( <u>+2.1</u> ) x 10 <sup>-4</sup>  | 100           |
| Held at pH 8 for 1 hour              | 4h                | 6.0 ( <u>+2.9</u> ) x 10 <sup>-4</sup>  | 85.7          |
| Frozen at -80C overnight and thawed  | 4h                | 4.4 ( <u>+3.3</u> ) x 10 <sup>-4</sup>  | 62.9          |
| Digested with proteinase K for 1 h   | 4h                | 4.1 ( <u>+1.9</u> ) x 10 <sup>-4</sup>  | 58.6          |
| Extracted into methylene chloride    | 4h                | 3.2 ( <u>+1.3</u> ) x 10 <sup>-4</sup>  | 45.7          |
| Flowthrough from a 3 kDa filter      | 4h                | 3.7 ( <u>+2.0</u> ) x 10 <sup>-4</sup>  | 52.9          |

Table S2
