# Supplementary material
Source: PubMed Central journal article supplement (PMC4424051)

# Figure S1

GLY + GlcN

W303 [*GAR*<sup>+</sup>]

After GdnHCl 'curing'

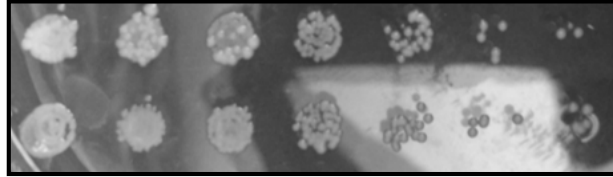

Supplement: NIHMS683042-supplement-Figure_S1.pdf [file NIHMS683042-supplement-Figure_S1.pdf]

# Figure S2

Cultured with *S. gallinarium*

Cultured with no bacteria

74D [*psi*]

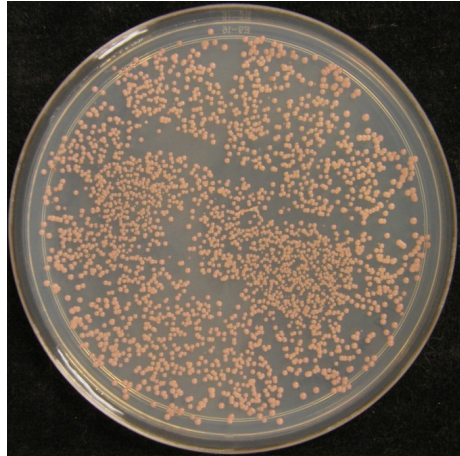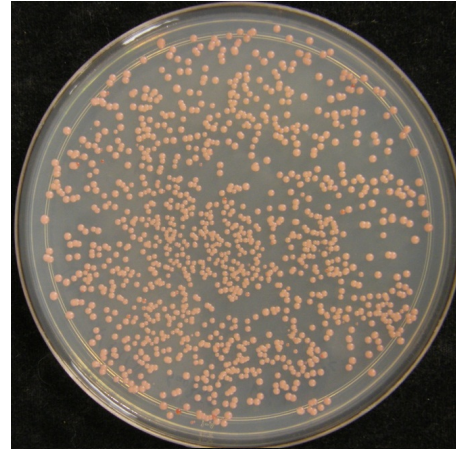

74D [*PSI*<sup>+</sup>]

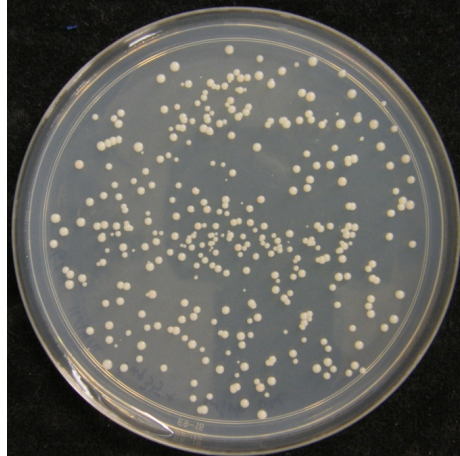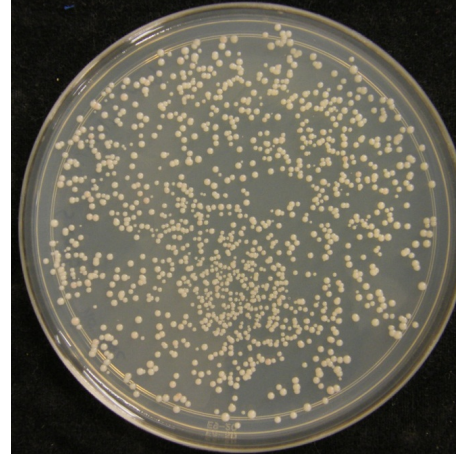

Supplement: NIHMS683042-supplement-Figure_S2.pdf [file NIHMS683042-supplement-Figure_S2.pdf]

Figure S3

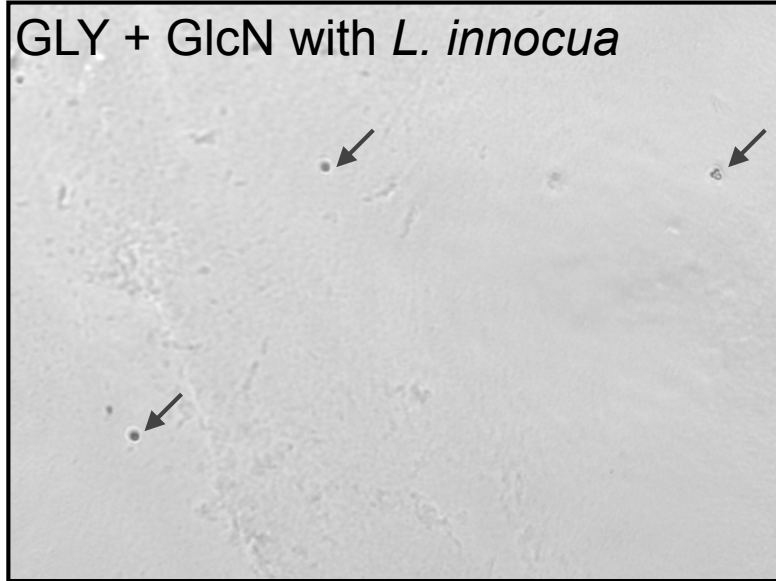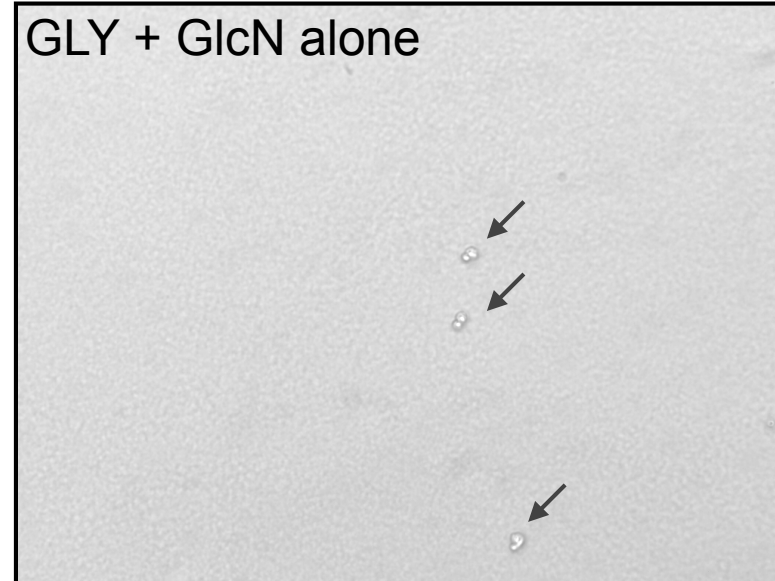

Supplement: NIHMS683042-supplement-Figure_S3.pdf [file NIHMS683042-supplement-Figure_S3.pdf]

# Figure S4

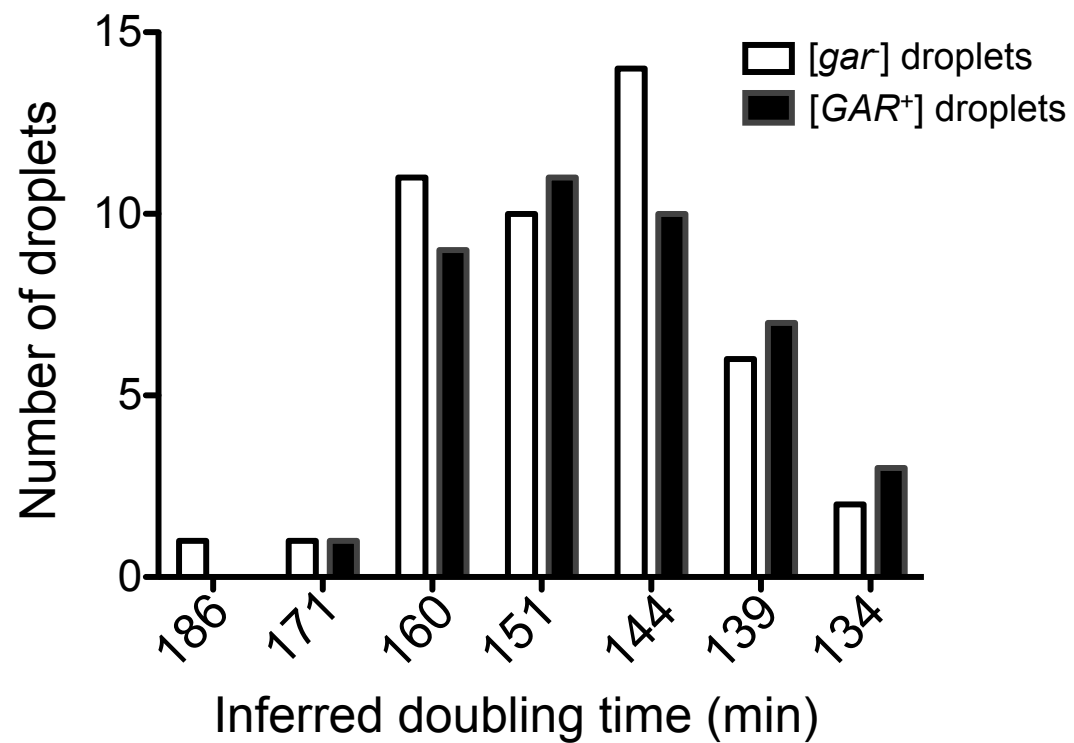

Supplement: NIHMS683042-supplement-Figure_S4.pdf [file NIHMS683042-supplement-Figure_S4.pdf]
